# Supplementary material for: Development of a scale to evaluate midwives’ beliefs about assessing alcohol use during pregnancy
Source: PubMed Central journal article supplement (PMC4696289; doi:10.1186/s12884-015-0779-6), 2015-12-30
Supplement: 12884_2015_779_MOESM1_ESM.pdf [file 12884_2015_779_MOESM1_ESM.pdf]

## Alcohol and Pregnancy Questionnaire

### The section of the questionnaire asks about you.

1. Are you a midwife?

<sub>0</sub> no → END – Thank you, only midwives are asked to complete the questionnaire

<sub>1</sub> yes

2. How long have you worked as a midwife? \_\_\_\_ years

3. How long have you been employed by WACHS as a midwife? \_\_\_\_ years

4. What was the year of your initial graduation from midwifery education? \_\_\_\_ year

5. What is your age? \_\_\_\_ years

6. What is your gender? <sub>1</sub> female <sub>2</sub> male

7. In which health region do you mainly work? (choose **one**)

<sub>1</sub> Kimberley

<sub>2</sub> Pilbara

<sub>3</sub> Midwest

<sub>4</sub> Goldfields

<sub>5</sub> Wheatbelt

<sub>6</sub> South West

<sub>7</sub> Great Southern

<sub>8</sub> Other (please specify) \_\_\_\_\_

### The next questions relate to alcohol consumption in pregnancy.

8. Is alcohol consumption during pregnancy associated with any of the following effects on the fetus and child? (choose **all that apply**)

<sub>1</sub> neonatal abstinence syndrome

<sub>2</sub> delayed development

<sub>3</sub> learning disabilities

<sub>4</sub> lowered intelligence

<sub>5</sub> behavioural problems

<sub>6</sub> preterm birth

<sub>7</sub> seizures

<sub>8</sub> structural brain damage

<sub>9</sub> spontaneous abortion

<sub>10</sub> Attention Deficit Hyperactivity Disorder (ADHD)

<sub>11</sub> long term emotional disorders

<sub>12</sub> disrupted school experience

<sub>13</sub> alcohol and/or other drug dependence

<sub>14</sub> legal problems

<sub>15</sub> not sure

<sub>16</sub> other (please specify) \_\_\_\_\_

9. Does alcohol consumption during pregnancy cause any of the following conditions? (choose **all that apply**)

- <sub>1</sub> Fetal Alcohol Syndrome (FAS)
- <sub>2</sub> Fetal Alcohol Spectrum Disorder (FASD)
- <sub>3</sub> birth defects
- <sub>4</sub> neurological impairment
- <sub>5</sub> Alcohol-Related Neurodevelopmental Disorder (ARND)
- <sub>6</sub> Attention Deficit Hyperactivity Disorder (ADHD)
- <sub>7</sub> Alcohol-Related Birth Defects (ARBD)
- <sub>8</sub> failure to thrive
- <sub>9</sub> autism
- <sub>10</sub> not sure
- <sub>11</sub> other (please specify) \_\_\_\_\_

10. Which of the following best describes the general advice you would give to pregnant women regarding alcohol consumption during pregnancy? (choose **all that apply**)

- <sub>1</sub> don't become intoxicated
- <sub>2</sub> alcohol is harmful in the first trimester
- <sub>3</sub> try to cut-down drinking alcohol
- <sub>4</sub> not drinking alcohol in pregnancy is the safest option
- <sub>5</sub> drinking alcohol occasionally is OK
- <sub>6</sub> no specific recommendations are given
- <sub>7</sub> other (please specify) \_\_\_\_\_

11. Do you provide clinical care to pregnant women?

- <sub>1</sub> yes
- <sub>2</sub> no - please specify the reason why you do not provide clinical care \_\_\_\_\_

→ SKIP TO 132

***This section of the questionnaire asks about your current midwifery practice.***

12. In which area do you mostly work? (choose **one**)

- <sub>1</sub> antenatal care
- <sub>2</sub> labour and birth
- <sub>3</sub> postnatal care
- <sub>4</sub> booking clinic
- <sub>5</sub> other (please specify) \_\_\_\_\_

13. In which model of care do you mostly work? (choose **one**)

- <sub>1</sub> collaborative hospital team
- <sub>2</sub> caseload midwifery
- <sub>3</sub> shared care with general practitioners
- <sub>4</sub> general practitioner led care
- <sub>5</sub> team midwifery
- <sub>6</sub> antenatal midwives' clinic
- <sub>7</sub> community midwifery
- <sub>8</sub> other (please specify) \_\_\_\_\_

14. In a typical week, approximately how many pregnant women do you care for? \_\_\_\_ \_\_\_\_ number

***The next section of the questionnaire relates to your personal opinions about your current midwifery practice. Although some of the questions appear similar, it is important that you complete all of the questions. There are no right or wrong answers.***

***For the following items, please tick the circle that best reflects your opinion.***

Asking every pregnant woman about whether they have consumed alcohol during their pregnancy is ...

15.                    useful            worthless
16.                    harmful            beneficial
17.                    appropriate            inappropriate
18.                    unimportant            important
19.                    pleasant (for me)            unpleasant (for me)
20.                    good practice            bad practice

***Please indicate your agreement or disagreement with the following statements.***

Asking every pregnant woman about whether they have consumed alcohol during pregnancy ...

- |                                                                                            |                |                       |                       |                       |                       |                       |                       |                       |                   |
|--------------------------------------------------------------------------------------------|----------------|-----------------------|-----------------------|-----------------------|-----------------------|-----------------------|-----------------------|-----------------------|-------------------|
| 21. Will threaten my relationship with pregnant women                                      | Strongly agree | <input type="radio"/> | <input type="radio"/> | <input type="radio"/> | <input type="radio"/> | <input type="radio"/> | <input type="radio"/> | <input type="radio"/> | Strongly disagree |
| 22. Improves women's awareness of the importance of not consuming alcohol during pregnancy | Strongly agree | <input type="radio"/> | <input type="radio"/> | <input type="radio"/> | <input type="radio"/> | <input type="radio"/> | <input type="radio"/> | <input type="radio"/> | Strongly disagree |
| 23. Will lead to some women feeling judged                                                 | Strongly agree | <input type="radio"/> | <input type="radio"/> | <input type="radio"/> | <input type="radio"/> | <input type="radio"/> | <input type="radio"/> | <input type="radio"/> | Strongly disagree |
| 24. Will identify women who need support to stop consuming alcohol during pregnancy        | Strongly agree | <input type="radio"/> | <input type="radio"/> | <input type="radio"/> | <input type="radio"/> | <input type="radio"/> | <input type="radio"/> | <input type="radio"/> | Strongly disagree |
| 25. Will distress or anger pregnant women                                                  | Strongly agree | <input type="radio"/> | <input type="radio"/> | <input type="radio"/> | <input type="radio"/> | <input type="radio"/> | <input type="radio"/> | <input type="radio"/> | Strongly disagree |
| 26. Is necessary for me to provide appropriate advice and support                          | Strongly agree | <input type="radio"/> | <input type="radio"/> | <input type="radio"/> | <input type="radio"/> | <input type="radio"/> | <input type="radio"/> | <input type="radio"/> | Strongly disagree |
| 27. Will cause anxiety and guilt among women who have consumed alcohol during pregnancy    | Strongly agree | <input type="radio"/> | <input type="radio"/> | <input type="radio"/> | <input type="radio"/> | <input type="radio"/> | <input type="radio"/> | <input type="radio"/> | Strongly disagree |
| 28. Will enable changes in behaviour and improved health outcomes for the mother and child | Strongly agree | <input type="radio"/> | <input type="radio"/> | <input type="radio"/> | <input type="radio"/> | <input type="radio"/> | <input type="radio"/> | <input type="radio"/> | Strongly disagree |
| 29. Will uncover complex problems that are difficult for us to address as midwives         | Strongly agree | <input type="radio"/> | <input type="radio"/> | <input type="radio"/> | <input type="radio"/> | <input type="radio"/> | <input type="radio"/> | <input type="radio"/> | Strongly disagree |
| 30. Offers little real benefit for women who are not in high risk groups                   | Strongly agree | <input type="radio"/> | <input type="radio"/> | <input type="radio"/> | <input type="radio"/> | <input type="radio"/> | <input type="radio"/> | <input type="radio"/> | Strongly disagree |
| 31. Could make women fear losing custody of their child                                    | Strongly agree | <input type="radio"/> | <input type="radio"/> | <input type="radio"/> | <input type="radio"/> | <input type="radio"/> | <input type="radio"/> | <input type="radio"/> | Strongly disagree |
| 32. Will make it easier to diagnose or exclude alcohol related problems in the child       | Strongly agree | <input type="radio"/> | <input type="radio"/> | <input type="radio"/> | <input type="radio"/> | <input type="radio"/> | <input type="radio"/> | <input type="radio"/> | Strongly disagree |

**Please indicate your agreement or disagreement with the following statements.**

- |                                                                                                                                                                                            |                |                       |                       |                       |                       |                       |                       |                       |                   |
|--------------------------------------------------------------------------------------------------------------------------------------------------------------------------------------------|----------------|-----------------------|-----------------------|-----------------------|-----------------------|-----------------------|-----------------------|-----------------------|-------------------|
| 33. I intend to ask every pregnant woman about whether they have consumed alcohol during pregnancy                                                                                         | Strongly agree | <input type="radio"/> | <input type="radio"/> | <input type="radio"/> | <input type="radio"/> | <input type="radio"/> | <input type="radio"/> | <input type="radio"/> | Strongly disagree |
| 34. I don't like asking pregnant women to describe their behaviours which may have harmed their child                                                                                      | Strongly agree | <input type="radio"/> | <input type="radio"/> | <input type="radio"/> | <input type="radio"/> | <input type="radio"/> | <input type="radio"/> | <input type="radio"/> | Strongly disagree |
| 35. Women's approval of my practice is important to me                                                                                                                                     | Strongly agree | <input type="radio"/> | <input type="radio"/> | <input type="radio"/> | <input type="radio"/> | <input type="radio"/> | <input type="radio"/> | <input type="radio"/> | Strongly disagree |
| 36. My manager(s) would expect me to ask all pregnant women about whether they have consumed alcohol during pregnancy                                                                      | Strongly agree | <input type="radio"/> | <input type="radio"/> | <input type="radio"/> | <input type="radio"/> | <input type="radio"/> | <input type="radio"/> | <input type="radio"/> | Strongly disagree |
| 37. Asking pregnant women about whether they have consumed alcohol during pregnancy can make them feel uncomfortable                                                                       | Strongly agree | <input type="radio"/> | <input type="radio"/> | <input type="radio"/> | <input type="radio"/> | <input type="radio"/> | <input type="radio"/> | <input type="radio"/> | Strongly disagree |
| 38. Asking every pregnant woman about whether they have consumed alcohol during pregnancy is up to me                                                                                      | Strongly agree | <input type="radio"/> | <input type="radio"/> | <input type="radio"/> | <input type="radio"/> | <input type="radio"/> | <input type="radio"/> | <input type="radio"/> | Strongly disagree |
| 39. Pregnant women don't like to be asked about whether they have consumed alcohol during pregnancy                                                                                        | Strongly agree | <input type="radio"/> | <input type="radio"/> | <input type="radio"/> | <input type="radio"/> | <input type="radio"/> | <input type="radio"/> | <input type="radio"/> | Strongly disagree |
| 40. I have doubts about whether I am doing the right thing when pregnant women who have only consumed small amounts of alcohol experience guilt after discussing their alcohol consumption | Strongly agree | <input type="radio"/> | <input type="radio"/> | <input type="radio"/> | <input type="radio"/> | <input type="radio"/> | <input type="radio"/> | <input type="radio"/> | Strongly disagree |
| 41. I want to ask every pregnant woman about whether they have consumed alcohol during pregnancy                                                                                           | Strongly agree | <input type="radio"/> | <input type="radio"/> | <input type="radio"/> | <input type="radio"/> | <input type="radio"/> | <input type="radio"/> | <input type="radio"/> | Strongly disagree |
| 42. Asking pregnant women whether they have consumed alcohol during pregnancy could appear judgemental                                                                                     | Strongly agree | <input type="radio"/> | <input type="radio"/> | <input type="radio"/> | <input type="radio"/> | <input type="radio"/> | <input type="radio"/> | <input type="radio"/> | Strongly disagree |
| 43. Most pregnant women would expect me to ask every pregnant woman whether they have consumed alcohol during pregnancy                                                                    | Strongly agree | <input type="radio"/> | <input type="radio"/> | <input type="radio"/> | <input type="radio"/> | <input type="radio"/> | <input type="radio"/> | <input type="radio"/> | Strongly disagree |
| 44. I don't have sufficient time to ask every pregnant woman about whether they have consumed alcohol during pregnancy                                                                     | Strongly agree | <input type="radio"/> | <input type="radio"/> | <input type="radio"/> | <input type="radio"/> | <input type="radio"/> | <input type="radio"/> | <input type="radio"/> | Strongly disagree |
| 45. I feel comfortable asking every pregnant woman whether they have consumed alcohol during pregnancy                                                                                     | Strongly agree | <input type="radio"/> | <input type="radio"/> | <input type="radio"/> | <input type="radio"/> | <input type="radio"/> | <input type="radio"/> | <input type="radio"/> | Strongly disagree |
| 46. I have the required skills to ask every pregnant woman about whether they have consumed alcohol during pregnancy                                                                       | Strongly agree | <input type="radio"/> | <input type="radio"/> | <input type="radio"/> | <input type="radio"/> | <input type="radio"/> | <input type="radio"/> | <input type="radio"/> | Strongly disagree |
| 47. Brief intervention (assessment, feedback, counselling and referral to a specialist if necessary) to decrease alcohol exposure in pregnancy is effective                                | Strongly agree | <input type="radio"/> | <input type="radio"/> | <input type="radio"/> | <input type="radio"/> | <input type="radio"/> | <input type="radio"/> | <input type="radio"/> | Strongly disagree |
| 48. Most people whose views I value would approve of me asking all pregnant women whether they have consumed alcohol during pregnancy                                                      | Strongly agree | <input type="radio"/> | <input type="radio"/> | <input type="radio"/> | <input type="radio"/> | <input type="radio"/> | <input type="radio"/> | <input type="radio"/> | Strongly disagree |

**Please indicate your agreement or disagreement with the following statements.**

- |                                                                                                                                         |                |                       |                       |                       |                       |                       |                       |                       |                   |
|-----------------------------------------------------------------------------------------------------------------------------------------|----------------|-----------------------|-----------------------|-----------------------|-----------------------|-----------------------|-----------------------|-----------------------|-------------------|
| 49. I know exactly what I need to do to ask pregnant women about whether they have consumed alcohol during pregnancy                    | Strongly agree | <input type="radio"/> | <input type="radio"/> | <input type="radio"/> | <input type="radio"/> | <input type="radio"/> | <input type="radio"/> | <input type="radio"/> | Strongly disagree |
| 50. Identifying all women who drink any amount of alcohol during pregnancy is good practice                                             | Strongly agree | <input type="radio"/> | <input type="radio"/> | <input type="radio"/> | <input type="radio"/> | <input type="radio"/> | <input type="radio"/> | <input type="radio"/> | Strongly disagree |
| 51. Asking every pregnant woman about whether they have consumed alcohol during pregnancy is beyond my control                          | Strongly agree | <input type="radio"/> | <input type="radio"/> | <input type="radio"/> | <input type="radio"/> | <input type="radio"/> | <input type="radio"/> | <input type="radio"/> | Strongly disagree |
| 52. Most midwives would ask every pregnant woman about whether they have consumed alcohol during pregnancy                              | Strongly agree | <input type="radio"/> | <input type="radio"/> | <input type="radio"/> | <input type="radio"/> | <input type="radio"/> | <input type="radio"/> | <input type="radio"/> | Strongly disagree |
| 53. When I discuss the effects on the fetus and child of alcohol consumption during pregnancy I know what to say                        | Strongly agree | <input type="radio"/> | <input type="radio"/> | <input type="radio"/> | <input type="radio"/> | <input type="radio"/> | <input type="radio"/> | <input type="radio"/> | Strongly disagree |
| 54. Asking every pregnant woman about whether they have consumed alcohol during pregnancy would be easy                                 | Strongly agree | <input type="radio"/> | <input type="radio"/> | <input type="radio"/> | <input type="radio"/> | <input type="radio"/> | <input type="radio"/> | <input type="radio"/> | Strongly disagree |
| 55. I have a good understanding of the evidence for the recommendation of no alcohol in pregnancy                                       | Strongly agree | <input type="radio"/> | <input type="radio"/> | <input type="radio"/> | <input type="radio"/> | <input type="radio"/> | <input type="radio"/> | <input type="radio"/> | Strongly disagree |
| 56. I have sufficient referral resources to adequately address alcohol use problems once identified                                     | Strongly agree | <input type="radio"/> | <input type="radio"/> | <input type="radio"/> | <input type="radio"/> | <input type="radio"/> | <input type="radio"/> | <input type="radio"/> | Strongly disagree |
| 57. Documentation of any amount of alcohol exposure in pregnancy is important                                                           | Strongly agree | <input type="radio"/> | <input type="radio"/> | <input type="radio"/> | <input type="radio"/> | <input type="radio"/> | <input type="radio"/> | <input type="radio"/> | Strongly disagree |
| 58. Most people who are important to me think that I should ask all pregnant women whether they have consumed alcohol during pregnancy  | Strongly agree | <input type="radio"/> | <input type="radio"/> | <input type="radio"/> | <input type="radio"/> | <input type="radio"/> | <input type="radio"/> | <input type="radio"/> | Strongly disagree |
| 59. I plan to ask every pregnant woman about whether they have consumed alcohol during pregnancy                                        | Strongly agree | <input type="radio"/> | <input type="radio"/> | <input type="radio"/> | <input type="radio"/> | <input type="radio"/> | <input type="radio"/> | <input type="radio"/> | Strongly disagree |
| 60. Most pregnant women know not to drink alcohol during pregnancy                                                                      | Strongly agree | <input type="radio"/> | <input type="radio"/> | <input type="radio"/> | <input type="radio"/> | <input type="radio"/> | <input type="radio"/> | <input type="radio"/> | Strongly disagree |
| 61. I am uncomfortable asking pregnant women about their alcohol consumption when it is the first time I have met them                  | Strongly agree | <input type="radio"/> | <input type="radio"/> | <input type="radio"/> | <input type="radio"/> | <input type="radio"/> | <input type="radio"/> | <input type="radio"/> | Strongly disagree |
| 62. I always know what to say when I ask pregnant women about whether they have consumed alcohol during pregnancy                       | Strongly agree | <input type="radio"/> | <input type="radio"/> | <input type="radio"/> | <input type="radio"/> | <input type="radio"/> | <input type="radio"/> | <input type="radio"/> | Strongly disagree |
| 63. Women who have consumed alcohol during pregnancy will consider terminating their pregnancy if asked about their alcohol consumption | Strongly agree | <input type="radio"/> | <input type="radio"/> | <input type="radio"/> | <input type="radio"/> | <input type="radio"/> | <input type="radio"/> | <input type="radio"/> | Strongly disagree |
| 64. Most pregnant women already have good knowledge about alcohol consumption in pregnancy                                              | Strongly agree | <input type="radio"/> | <input type="radio"/> | <input type="radio"/> | <input type="radio"/> | <input type="radio"/> | <input type="radio"/> | <input type="radio"/> | Strongly disagree |
| 65. When I feel short of time I am less likely to ask pregnant women about whether they have consumed alcohol during pregnancy          | Strongly agree | <input type="radio"/> | <input type="radio"/> | <input type="radio"/> | <input type="radio"/> | <input type="radio"/> | <input type="radio"/> | <input type="radio"/> | Strongly disagree |

**Please indicate your agreement or disagreement with the following statements.**

- |                                                                                                                                                                                           |                |                       |                       |                       |                       |                       |                       |                       |                   |
|-------------------------------------------------------------------------------------------------------------------------------------------------------------------------------------------|----------------|-----------------------|-----------------------|-----------------------|-----------------------|-----------------------|-----------------------|-----------------------|-------------------|
| 66. I want my clinical management of pregnant women to be consistent with best practice                                                                                                   | Strongly agree | <input type="radio"/> | <input type="radio"/> | <input type="radio"/> | <input type="radio"/> | <input type="radio"/> | <input type="radio"/> | <input type="radio"/> | Strongly disagree |
| 67. What other midwives think I should do matters to me                                                                                                                                   | Strongly agree | <input type="radio"/> | <input type="radio"/> | <input type="radio"/> | <input type="radio"/> | <input type="radio"/> | <input type="radio"/> | <input type="radio"/> | Strongly disagree |
| 68. It is difficult to ask pregnant women about alcohol consumption during pregnancy without good knowledge of the effects of alcohol consumption during pregnancy on the fetus and child | Strongly agree | <input type="radio"/> | <input type="radio"/> | <input type="radio"/> | <input type="radio"/> | <input type="radio"/> | <input type="radio"/> | <input type="radio"/> | Strongly disagree |
| 69. Identifying all women who drink alcohol during pregnancy can help to improve health outcomes                                                                                          | Strongly agree | <input type="radio"/> | <input type="radio"/> | <input type="radio"/> | <input type="radio"/> | <input type="radio"/> | <input type="radio"/> | <input type="radio"/> | Strongly disagree |
| 70. Most midwives would expect me to ask all pregnant women about whether they have consumed alcohol during pregnancy                                                                     | Strongly agree | <input type="radio"/> | <input type="radio"/> | <input type="radio"/> | <input type="radio"/> | <input type="radio"/> | <input type="radio"/> | <input type="radio"/> | Strongly disagree |
| 71. Factors outside my control prevent me from asking every pregnant woman about whether they have consumed alcohol during pregnancy                                                      | Strongly agree | <input type="radio"/> | <input type="radio"/> | <input type="radio"/> | <input type="radio"/> | <input type="radio"/> | <input type="radio"/> | <input type="radio"/> | Strongly disagree |
| 72. I am uncomfortable asking pregnant women about their alcohol consumption before establishing a relationship of trust with them                                                        | Strongly agree | <input type="radio"/> | <input type="radio"/> | <input type="radio"/> | <input type="radio"/> | <input type="radio"/> | <input type="radio"/> | <input type="radio"/> | Strongly disagree |
| 73. It is expected of me that I ask all pregnant women whether they consumed alcohol during pregnancy                                                                                     | Strongly agree | <input type="radio"/> | <input type="radio"/> | <input type="radio"/> | <input type="radio"/> | <input type="radio"/> | <input type="radio"/> | <input type="radio"/> | Strongly disagree |
| 74. I am confident that I can ask every pregnant woman about whether they consumed alcohol during pregnancy                                                                               | Strongly agree | <input type="radio"/> | <input type="radio"/> | <input type="radio"/> | <input type="radio"/> | <input type="radio"/> | <input type="radio"/> | <input type="radio"/> | Strongly disagree |
| 75. I am uncomfortable asking pregnant women about their alcohol consumption as I may have a responsibility to notify the Department of Child Protection                                  | Strongly agree | <input type="radio"/> | <input type="radio"/> | <input type="radio"/> | <input type="radio"/> | <input type="radio"/> | <input type="radio"/> | <input type="radio"/> | Strongly disagree |
| 76. Pregnant women should completely abstain from consuming alcohol                                                                                                                       | Strongly agree | <input type="radio"/> | <input type="radio"/> | <input type="radio"/> | <input type="radio"/> | <input type="radio"/> | <input type="radio"/> | <input type="radio"/> | Strongly disagree |
| 77. Women planning to become pregnant in the near future should abstain from consuming alcohol                                                                                            | Strongly agree | <input type="radio"/> | <input type="radio"/> | <input type="radio"/> | <input type="radio"/> | <input type="radio"/> | <input type="radio"/> | <input type="radio"/> | Strongly disagree |
| 78. Infrequent consumption of one standard drink of alcohol during pregnancy is not harmful to the mother or fetus                                                                        | Strongly agree | <input type="radio"/> | <input type="radio"/> | <input type="radio"/> | <input type="radio"/> | <input type="radio"/> | <input type="radio"/> | <input type="radio"/> | Strongly disagree |
| 79. Information about the effect alcohol may have on the fetus should be readily available to women of childbearing age                                                                   | Strongly agree | <input type="radio"/> | <input type="radio"/> | <input type="radio"/> | <input type="radio"/> | <input type="radio"/> | <input type="radio"/> | <input type="radio"/> | Strongly disagree |
| 80. Pregnant women expect midwives to advise them about the consequences of alcohol consumption in pregnancy                                                                              | Strongly agree | <input type="radio"/> | <input type="radio"/> | <input type="radio"/> | <input type="radio"/> | <input type="radio"/> | <input type="radio"/> | <input type="radio"/> | Strongly disagree |

**The next questions are about your current midwifery practice.  
Please tick the box or circle that best reflects your practice.**

81. Do you ask pregnant women about their alcohol consumption?

<sub>0</sub> no - please specify the reason why you do not ask pregnant women about their alcohol consumption

→ SKIP TO 103

<sub>1</sub> yes

When you ask pregnant women about their alcohol consumption, do you ask about their history of drinking ...

82. During their current pregnancy Always         Never

83. For the period before their current pregnancy Always         Never

84. During the period between conception and recognition of their current pregnancy Always         Never

85. Do you ever see pregnant women at their first antenatal visit?

<sub>0</sub> no →SKIP TO 88

<sub>1</sub> yes

86. In a typical week, how many pregnant women do you see for their first antenatal visit?

\_\_\_\_\_ number

87. At the first antenatal visit, do you ask pregnant women about their alcohol consumption in pregnancy? Always         Never

88. Do you ever see pregnant women at their booking visit?

<sub>0</sub> no →SKIP TO 90

<sub>1</sub> yes

89. At the booking visit, do you ask pregnant women about their alcohol consumption in pregnancy? Always         Never

90. Do you ever see pregnant women during their first trimester of pregnancy?

<sub>0</sub> no →SKIP TO 92

<sub>1</sub> yes

91. When you see pregnant women during the first trimester of pregnancy, do you ask them about their alcohol consumption in pregnancy? Always         Never

92. Do you ever see pregnant women during their second trimester of pregnancy?

<sub>0</sub> no →SKIP TO 94

<sub>1</sub> yes

93. When you see pregnant women during the second trimester of pregnancy, do you ask them about their alcohol consumption in pregnancy? Always         Never

94. Do you ever see pregnant women during their third trimester of pregnancy?

\_0 no →SKIP TO 96

\_1 yes

95. When you see pregnant women during the third trimester of pregnancy, do you ask them about their alcohol consumption in pregnancy? Always ○ ○ ○ ○ ○ ○ ○ Never

Do you use any of the following screening tools to assess alcohol consumption during pregnancy?

96. WACHS Alcohol AUDIT Tool (Form MR202E) \_1 Yes \_0 No

97. AUDIT-C (Alcohol Use Disorders Identification Test - Consumption) \_1 Yes \_0 No

98. T-ACE (Tolerance, Annoyed, Cut down, Eye-opener) \_1 Yes \_0 No

99. TWEAK (Tolerance, Worry, Eye-opener, Amnesia, Cut-down) \_1 Yes \_0 No

100. CAGE (Cut down, Annoyed, Guilty, Eye-opener) \_1 Yes \_0 No

101. MAST (Michigan Alcoholism Screening Test) \_1 Yes \_0 No

102. other (please specify) \_\_\_\_\_

103. Do you provide information to pregnant women about the effects on the fetus and child of consuming alcohol during pregnancy? Always ○ ○ ○ ○ ○ ○ ○ Never

104. Are you aware of policies, procedures or operational directives in WACHS advising assessment of alcohol consumption during pregnancy? \_1 yes \_0 no

105. If indicated, do you conduct brief intervention for alcohol consumption in pregnancy? \_1 yes \_0 no

106. Did you receive brief intervention training for alcohol consumption during pregnancy at your orientation? \_1 yes \_0 no

107. Have you completed brief intervention training for alcohol consumption during pregnancy as part of professional development within the last 2 years? \_1 yes \_0 no

Are you confident that you can ...

108. Assess alcohol consumption during pregnancy Very confident ○ ○ ○ ○ ○ ○ ○ Not at all confident

109. Advise pregnant women about alcohol consumption during pregnancy Very confident ○ ○ ○ ○ ○ ○ ○ Not at all confident

110. Explain to pregnant women the effects on the fetus and child of alcohol consumption during pregnancy Very confident ○ ○ ○ ○ ○ ○ ○ Not at all confident

111. Conduct brief intervention for alcohol consumption during pregnancy Very confident ○ ○ ○ ○ ○ ○ ○ Not at all confident



Do you have sufficient time to ...

- |                                                                                                           |        |                       |                       |                       |                       |                       |                       |                       |       |
|-----------------------------------------------------------------------------------------------------------|--------|-----------------------|-----------------------|-----------------------|-----------------------|-----------------------|-----------------------|-----------------------|-------|
| 112. Assess alcohol consumption during pregnancy                                                          | Always | <input type="radio"/> | <input type="radio"/> | <input type="radio"/> | <input type="radio"/> | <input type="radio"/> | <input type="radio"/> | <input type="radio"/> | Never |
| 113. Advise pregnant women about alcohol consumption during pregnancy                                     | Always | <input type="radio"/> | <input type="radio"/> | <input type="radio"/> | <input type="radio"/> | <input type="radio"/> | <input type="radio"/> | <input type="radio"/> | Never |
| 114. Explain to pregnant women the effects on the fetus and child of alcohol consumption during pregnancy | Always | <input type="radio"/> | <input type="radio"/> | <input type="radio"/> | <input type="radio"/> | <input type="radio"/> | <input type="radio"/> | <input type="radio"/> | Never |
| 115. Conduct brief intervention for alcohol consumption during pregnancy                                  | Always | <input type="radio"/> | <input type="radio"/> | <input type="radio"/> | <input type="radio"/> | <input type="radio"/> | <input type="radio"/> | <input type="radio"/> | Never |

Could you offer greater support to pregnant women if you had ...

- |                                                                                                                                  |        |                       |                       |                       |                       |                       |                       |                       |       |
|----------------------------------------------------------------------------------------------------------------------------------|--------|-----------------------|-----------------------|-----------------------|-----------------------|-----------------------|-----------------------|-----------------------|-------|
| 116. More involvement in antenatal care                                                                                          | Always | <input type="radio"/> | <input type="radio"/> | <input type="radio"/> | <input type="radio"/> | <input type="radio"/> | <input type="radio"/> | <input type="radio"/> | Never |
| 117. More involvement in early pregnancy care                                                                                    | Always | <input type="radio"/> | <input type="radio"/> | <input type="radio"/> | <input type="radio"/> | <input type="radio"/> | <input type="radio"/> | <input type="radio"/> | Never |
| 118. Standardised forms to record health, medical and alcohol consumption history                                                | Always | <input type="radio"/> | <input type="radio"/> | <input type="radio"/> | <input type="radio"/> | <input type="radio"/> | <input type="radio"/> | <input type="radio"/> | Never |
| 119. More knowledge about conversational techniques to use when assessing alcohol consumption in pregnancy                       | Always | <input type="radio"/> | <input type="radio"/> | <input type="radio"/> | <input type="radio"/> | <input type="radio"/> | <input type="radio"/> | <input type="radio"/> | Never |
| 120. Prompts for brief intervention                                                                                              | Always | <input type="radio"/> | <input type="radio"/> | <input type="radio"/> | <input type="radio"/> | <input type="radio"/> | <input type="radio"/> | <input type="radio"/> | Never |
| 121. More accessible specialist alcohol services for referring pregnant women to                                                 | Always | <input type="radio"/> | <input type="radio"/> | <input type="radio"/> | <input type="radio"/> | <input type="radio"/> | <input type="radio"/> | <input type="radio"/> | Never |
| 122. Greater supply of written materials to give to pregnant women                                                               | Always | <input type="radio"/> | <input type="radio"/> | <input type="radio"/> | <input type="radio"/> | <input type="radio"/> | <input type="radio"/> | <input type="radio"/> | Never |
| 123. More standardised resources to use when running antenatal classes or parenting education programs                           | Always | <input type="radio"/> | <input type="radio"/> | <input type="radio"/> | <input type="radio"/> | <input type="radio"/> | <input type="radio"/> | <input type="radio"/> | Never |
| 124. Web-based educational resources for midwives about alcohol consumption during pregnancy and fetal alcohol spectrum disorder | Always | <input type="radio"/> | <input type="radio"/> | <input type="radio"/> | <input type="radio"/> | <input type="radio"/> | <input type="radio"/> | <input type="radio"/> | Never |
| 125. Hard-copy educational resources for midwives about alcohol consumption during pregnancy and fetal alcohol spectrum disorder | Always | <input type="radio"/> | <input type="radio"/> | <input type="radio"/> | <input type="radio"/> | <input type="radio"/> | <input type="radio"/> | <input type="radio"/> | Never |
| 126. Professional development about alcohol consumption during pregnancy and fetal alcohol spectrum disorder                     | Always | <input type="radio"/> | <input type="radio"/> | <input type="radio"/> | <input type="radio"/> | <input type="radio"/> | <input type="radio"/> | <input type="radio"/> | Never |
| 127. Professional development about screening tools for alcohol consumption                                                      | Always | <input type="radio"/> | <input type="radio"/> | <input type="radio"/> | <input type="radio"/> | <input type="radio"/> | <input type="radio"/> | <input type="radio"/> | Never |
| 128. Professional development about brief intervention                                                                           | Always | <input type="radio"/> | <input type="radio"/> | <input type="radio"/> | <input type="radio"/> | <input type="radio"/> | <input type="radio"/> | <input type="radio"/> | Never |

129. Please list specialised alcohol services that you can access for referring pregnant women.

---

---

---

---

130. Please list resources that you can access to give to pregnant women on alcohol consumption during pregnancy and fetal alcohol spectrum disorder.

---

---

---

---

131. Are there any other comments that you would like to make?

---

---

---

---

132. Have you started filling in the online version of this questionnaire but not completed it? <sub>1</sub> Yes <sub>0</sub> No

IF YES, would you please give us your email address so we don't count your responses twice?

\_\_\_\_\_ email address

133. Do you wish to be included in the prize draw for the weekend away for two? <sub>1</sub> Yes <sub>0</sub> No

IF YES, please record your HE number \_\_\_\_\_ HE number

***Thank you for taking the time to participate in this study and complete the questionnaire.  
The information you provided will be used to support strategies to prevent fetal alcohol spectrum disorder, and we thank you for your valuable contribution to this process.***

*If you would like more information on alcohol and pregnancy and fetal alcohol spectrum disorder please visit our website <http://alcoholpregnancy.childhealthresearch.org.au/> or contact Jan Payne on 9489 7752 or [midwives@ichr.uwa.edu.au](mailto:midwives@ichr.uwa.edu.au).*
